# Supplementary material
Source: publisher figshare collection journal article supplement (https://acs.figshare.com/ndownloader/files/13652408)
Supplement: Supplementary file 1 [file 13652408]

Compound	SMILES	alpha7 nAChR affinity Ki (nM)	alpha7 nAChR IC50 (nM)	alpha9-alpha10 IC50 (nM)	72 h U87MG viability IC50 (microM)	72 h A549 viability IC50 (microM)	72 h SH-SY5Y viability IC50 (microM)	72 h astrocytes viability IC50 (microM)
MG624	CC[N+](CC)(CC)CCOC(C=C2)=CC=C2/C=C/C1=CC=CC=C1.[I-]	104	41	10	4.4	4.7	>100	47
PtN-2	CC[N+](CC)(CC)CCOC(C=C2)=CC=C2/C=C/C1=CC(OC)=CC(OC)=C1.[I-]	189	47	17.2	5.3	12	>100	23
RDM-4'BTPI	COC1=CC(/C=C/C2=CC=C(OCCCC[P+](C4=CC=CC=C4)(C5=CC=CC=C5)C3=CC=CC=C3)C=C2)=CC(OC)=C1.[I-]	1826	>10000	>10000	0.86	0.26	0.55	1
PtN-4	CC[N+](CC)(CC)CCCCOC(C=C2)=CC=C2/C=C/C1=CC(OC)=CC(OC)=C1.[I-]	305	24.3	11.9	0.57	3.3	11	22
StP-4	C1(/C=C/C2=CC=C(OCCCC[P+](C4=CC=CC=C4)(C5=CC=CC=C5)C3=CC=CC=C3)C=C2)=CC=CC=C1.[I-]	1638	nd	nd	0.64	0.42	3	0.4
StN-4	CC[N+](CC)(CC)CCCCOC(C=C2)=CC=C2/C=C/C1=CC=CC=C1.[I-]	186	6.5	5	1.8	3.5	31	11
StN-6	CC[N+](CC)(CC)CCCCCCOC(C=C2)=CC=C2/C=C/C1=CC=CC=C1.[I-]	465	13.3	4.8	3.9	3.6	30	5.8
StN-8	CC[N+](CC)(CC)CCCCCCCCOC(C=C2)=CC=C2/C=C/C1=CC=CC=C1.[I-]	164	92	6.6	0.11	0.49	10	2
StP-3	C1(/C=C/C2=CC=C(OCCC[P+](C4=CC=CC=C4)(C5=CC=CC=C5)C3=CC=CC=C3)C=C2)=CC=CC=C1.[I-]	984	nd	nd	1.4	1.8
StP-5	C1(/C=C/C2=CC=C(OCCCCC[P+](C4=CC=CC=C4)(C5=CC=CC=C5)C3=CC=CC=C3)C=C2)=CC=CC=C1.[I-]	2800	nd	nd	0.67	0.32
StP-6	C1(/C=C/C2=CC=C(OCCCCCC[P+](C4=CC=CC=C4)(C5=CC=CC=C5)C3=CC=CC=C3)C=C2)=CC=CC=C1.[I-]	559	nd	nd	0.38	0.15
StP-7	C1(/C=C/C2=CC=C(OCCCCCCC[P+](C4=CC=CC=C4)(C5=CC=CC=C5)C3=CC=CC=C3)C=C2)=CC=CC=C1.[I-]	617	nd	nd	0.36	0.12
StP-8	C1(/C=C/C2=CC=C(OCCCCCCCC[P+](C4=CC=CC=C4)(C5=CC=CC=C5)C3=CC=CC=C3)C=C2)=CC=CC=C1.[I-]	803	nd	nd	0.07	0.26
StP-9	C1(/C=C/C2=CC=C(OCCCCCCCCC[P+](C4=CC=CC=C4)(C5=CC=CC=C5)C3=CC=CC=C3)C=C2)=CC=CC=C1.[I-]	1123	nd	nd	0.09	0.11
StP-10	C1(/C=C/C2=CC=C(OCCCCCCCCCC[P+](C4=CC=CC=C4)(C5=CC=CC=C5)C3=CC=CC=C3)C=C2)=CC=CC=C1.[I-]	1980	nd	nd	0.06	0.1	0.21	0.38
